# Supplementary material for: One Is the Coldest Number: How Group Size and Body Weight Affect Thermal Preference in Weaned Pigs (3 to 15 kg)
Source: MDPI journal article supplement (doi:10.3390/ani11051447), 2021-05-18
Supplement: s1 [file s1]

**Supplementary Materials:** The following are available online at [www.mdpi.com/xxx/s1](http://www.mdpi.com/xxx/s1), Table S1: Ethogram for behaviors, Table S2: Ethogram for postures, Table S3 to S5: Statistical output, Figure S1: Image of conditioning box, Figure S2: Image of pig as sections used when coding video, and Figures S3 A-C demonstrate the equation use to create the regression models seen in Figures 3-5.

**Table S1:** Ethogram used for behavioral observations [13].

| Category | Behavior   | Description                                                                                                                                                                                                                                                          |
|----------|------------|----------------------------------------------------------------------------------------------------------------------------------------------------------------------------------------------------------------------------------------------------------------------|
| Active   | Active     | Pig is walking about, can be seen actively engaged with the environment or with another pig. This includes fighting or head tossing with another piglet or interacting with troughs located on the long ends of the thermal apparatuses such as biting or chewing.   |
|          | Eating     | Pigs head is in the feeding trough, located under heating elements (5 total), can only see back of head and ears while within in the feeding trough. All food troughs are located under the heating lamps.                                                           |
|          | Drinking   | Pigs head is in the watering trough, located opposite wall to heating elements (3 total), can only see back of head and ears while within in the watering trough. Water troughs are located on the opposite side of the thermal apparatus from the heating elements. |
|          | Defecation | Pig is stationary or in a dog-sit position, can see fecal matter being excreted                                                                                                                                                                                      |
| Inactive |            | Pig is motionless and assumed to be sleeping. The animal may be inactive if sitting, standing or lying still and alert. An animal is stationary, slow and small head movements may be seen but their body is motionless.                                             |
| Other    |            | Pigs' behavior cannot be determined, camera angles or glare do not allow for accurate assessment.                                                                                                                                                                    |

**Table S2:** Ethogram used for posture observations [13].

| Posture        | Description                                                                                                                                                                                                                                                                                                 |
|----------------|-------------------------------------------------------------------------------------------------------------------------------------------------------------------------------------------------------------------------------------------------------------------------------------------------------------|
| Upright        | Pigs' body is erect and top line (back) is to the camera, includes pig standing on all four hoofs on ground and dog-sitting where pig has rump on the floor.                                                                                                                                                |
| Sternal laying | Pig lies up-right with stomach and chest touching the ground, top line is facing the camera. This includes when a piglet is sternal on her anterior body and lateral on her posterior body. Sternal includes the medial plane of the head and body being perpendicular to a 45-degree angle to the ceiling. |
| Lateral laying | Pig lies on side with shoulder and rump touching the ground, top line is facing a wall. Medial plane of head and body are greater than 45 degrees and approximately 90 degrees to the ceiling.                                                                                                              |
| Huddling       | Pig is in contact with another piglet, with at least 50% of their bodies are touching. Pig can be sternal or lateral laying.                                                                                                                                                                                |
| Other          | Any other postures or those that cannot be determined, camera angles or glare do not allow for accurate assessment. When pig is in position transition and down on front knees but stays with hind end up for a while and may still be moving about.                                                        |

**Table S3.** Statistical terms included in the cubic regression model which tested for differences in the percent of observations in various locations (temperatures) while pigs were inactive.

| Parameters                           | F Value                    | p-Value |
|--------------------------------------|----------------------------|---------|
| GroupID(Sex*GroupSize*WeightCat)     | F <sub>18,127</sub> = 0.05 | 1.000   |
| Sex                                  | F <sub>1,127</sub> = 0.00  | 0.949   |
| GroupSize                            | F <sub>2,127</sub> = 4.05  | *0.020  |
| WeightCat                            | F <sub>2,127</sub> = 1.22  | 0.298   |
| Location                             | F <sub>1,127</sub> = 2.47  | 0.119   |
| Sex*GroupSize                        | F <sub>2,127</sub> = 0.01  | 0.989   |
| Sex*WeightCat                        | F <sub>2,127</sub> = 0.11  | 0.900   |
| GroupSize*WeightCat                  | F <sub>4,127</sub> = 0.09  | 0.986   |
| Location*GroupSize                   | F <sub>2,127</sub> = 6.90  | *0.001  |
| Location*WeightCat                   | F <sub>2,127</sub> = 15.01 | *<0.001 |
| GroupSize*WeightCat*Location         | F <sub>4,127</sub> = 2.36  | 0.057   |
| Sex*GroupSize*WeightCat              | F <sub>4,127</sub> = 0.24  | 0.914   |
| Location*Location                    | F <sub>1,127</sub> = 1.98  | 0.162   |
| Location*Location*GroupSize          | F <sub>2,127</sub> = 4.00  | *0.021  |
| Location*Location*WeightCat          | F <sub>2,127</sub> = 1.48  | 0.232   |
| Location*Location*Location           | F <sub>1,127</sub> = 0.85  | 0.357   |
| Location*Location*Location*WeightCat | F <sub>2,127</sub> = 5.23  | *0.007  |

\* denote a significant difference ( $p < 0.05$ ).

**Table S4.** Statistical terms included in the model which tested for differences in the percent of observations in various locations (temperatures) while pigs were huddling, groups tested as individuals has been excluded.

| Parameters                       | F Value                   | p-Value |
|----------------------------------|---------------------------|---------|
| GroupID(Sex*GroupSize*WeightCat) | F <sub>12,90</sub> = 0.23 | 0.996   |
| Sex                              | F <sub>1,90</sub> = 2.08  | 0.152   |
| GroupSize                        | F <sub>1,90</sub> = 0.28  | 0.599   |
| WeightCat                        | F <sub>2,90</sub> = 2.08  | 0.131   |
| Location                         | F <sub>1,90</sub> = 7.09  | *0.009  |
| Sex*GroupSize                    | F <sub>1,90</sub> = 0.00  | 0.959   |
| Sex*WeightCat                    | F <sub>2,90</sub> = 1.76  | 0.178   |
| GroupSize*WeightCat              | F <sub>2,90</sub> = 0.28  | 0.759   |
| Location*GroupSize               | F <sub>2,90</sub> = 0.58  | 0.447   |
| Location*WeightCat               | F <sub>2,90</sub> = 2.71  | 0.072   |
| Sex*GroupSize*WeightCat          | F <sub>1,90</sub> = 0.24  | 0.7865  |
| GroupSize*WeightCat*Location     | F <sub>1,90</sub> = 0.19  | 0.827   |

\* denote a significant difference ( $p < 0.05$ ).

**Table S5.** Statistical terms included in the model which tested for differences in the percent of observations in various locations (temperatures) while piglets were in various postures, huddling has been excluded.

| Parameters                           | F Value                    | <i>p</i> -Value |
|--------------------------------------|----------------------------|-----------------|
| GroupID(Sex*GroupSize*WeightCat)     | F <sub>18,459</sub> = 0.63 | 0.875           |
| Sex                                  | F <sub>1,459</sub> = 5.43  | *0.020          |
| GroupSize                            | F <sub>2,459</sub> = 10.40 | *<0.001         |
| WeightCat                            | F <sub>2,459</sub> = 7.37  | *0.001          |
| Posture                              | F <sub>2,459</sub> = 47.31 | *<0.001         |
| Location                             | F <sub>1,459</sub> = 12.17 | *0.001          |
| Sex*GroupSize                        | F <sub>2,459</sub> = 4.73  | *0.009          |
| Sex*WeightCat                        | F <sub>2,459</sub> = 0.09  | 0.916           |
| GroupSize*WeightCat                  | F <sub>4,459</sub> = 1.14  | 0.339           |
| GroupSize*Posture                    | F <sub>4,459</sub> = 0.39  | 0.816           |
| GroupSize*Location                   | F <sub>4,459</sub> = 19.53 | *<0.001         |
| WeightCat*Posture                    | F <sub>4,459</sub> = 1.33  | 0.257           |
| WeightCat*Location                   | F <sub>2,459</sub> = 36.44 | *<0.001         |
| Posture*Location                     | F <sub>2,459</sub> = 1.62  | 0.200           |
| Sex*GroupSize*WeightCat              | F <sub>2,459</sub> = 1.89  | 0.111           |
| GroupSize*WeightCat*Location         | F <sub>4,459</sub> = 8.30  | *<0.001         |
| GroupSize*Posture*Location           | F <sub>4,459</sub> = 1.61  | 0.170           |
| WeightCat*Posture*Location           | F <sub>4,459</sub> = 11.52 | *<0.001         |
| GroupSize*WeightCat*Posture          | F <sub>8,459</sub> = 1.24  | 0.272           |
| Location*Location                    | F <sub>1,459</sub> = 9.47  | *0.002          |
| Location*Location*GroupSize          | F <sub>2,459</sub> = 11.52 | *<0.001         |
| Location*Location*WeightCat          | F <sub>2,459</sub> = 4.50  | *0.012          |
| Location*Location*Location           | F <sub>1,459</sub> = 6.26  | *0.013          |
| Location*Location*Location*WeightCat | F <sub>2,459</sub> = 9.81  | *<0.001         |

\* denote a significant difference ( $p < 0.05$ ).

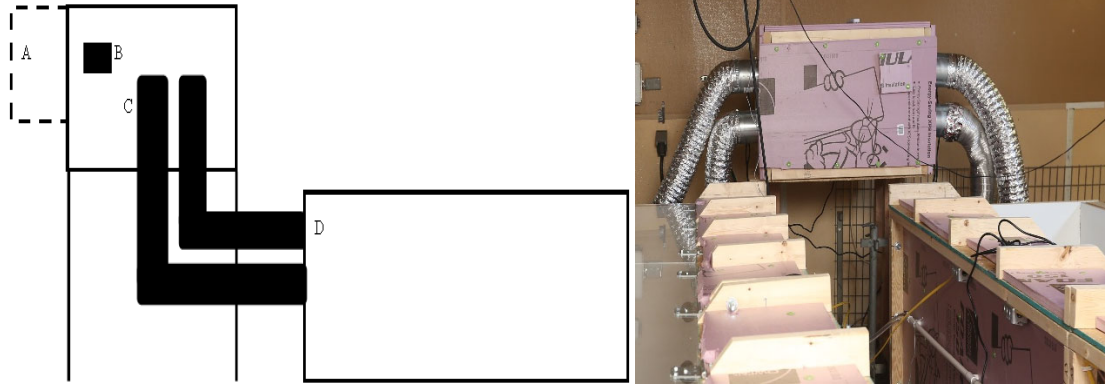

**Figure S1:** Image on the left displays the conditioning box used to push cold air into the thermal apparatuses, image on the right actual picture of the conditioning box. Here pictured is only one of the apparatuses. Legend: A) air conditioner, B) coolbot, C) ducts, D) thermal apparatus.

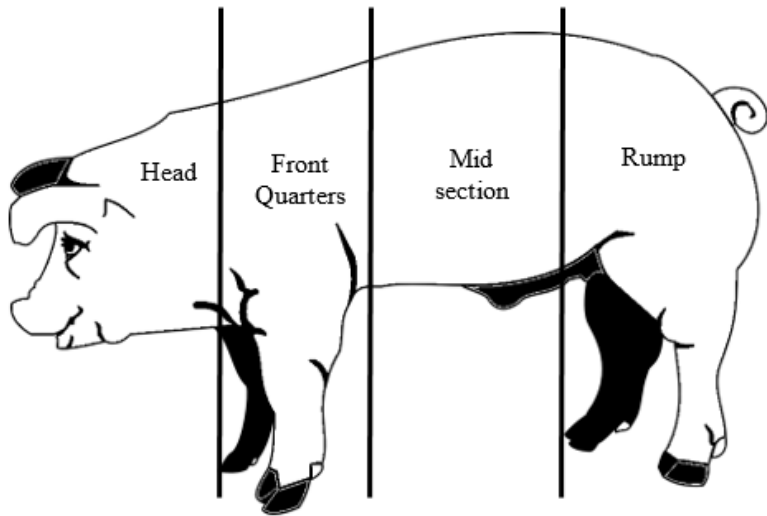

**Figure S2:** Diagram depicting sections of a pig used to assess percentage of body part located within a thermal section, each body section was equivalent to 25%. Head was considered from back of the ears to the snout, front quarters were considered back of the ears to behind the forelimbs, mid-section was from behind the forelimbs to front of the back limbs, and the rump was considered the front of the back limbs to base of the tail [13].

0.7291889281

S 3A)

$$+ \text{Match}(\text{GroupSize}) \begin{pmatrix} 1 & \Rightarrow -0.107123199 \\ 4 & \Rightarrow 0.0476670592 \\ 2 & \Rightarrow 0.0594561396 \\ \text{else} & \Rightarrow . \end{pmatrix}$$

+ -0.01926068 • Temperature

$$+ \text{Match}(\text{GroupSize}) \begin{pmatrix} 1 & \Rightarrow (\text{Temperature} - 24.418) \cdot 0.0215604468 \\ 4 & \Rightarrow (\text{Temperature} - 24.418) \cdot -0.009830977 \\ 2 & \Rightarrow (\text{Temperature} - 24.418) \cdot -0.01172947 \\ \text{else} & \Rightarrow . \end{pmatrix}$$

+  $(\text{Temperature} - 24.418) \cdot ((\text{Temperature} - 24.418) \cdot 0.0015778529)$

$(\text{Temperature} - 24.418)$

$$+ \left( (\text{Temperature} - 24.418) \cdot \text{Match}(\text{GroupSize}) \begin{pmatrix} 1 & \Rightarrow 0.0044011141 \\ 4 & \Rightarrow -0.00161496 \\ 2 & \Rightarrow -0.002786154 \\ \text{else} & \Rightarrow . \end{pmatrix} \right)$$

0.7291889281

S 3B)

$$+ \text{Match}(\text{WgtCat}) \begin{pmatrix} \text{"L"} \Rightarrow 0.0408059145 \\ \text{"M"} \Rightarrow 0.0165020453 \\ \text{"S"} \Rightarrow -0.05730796 \\ \text{else} \Rightarrow . \end{pmatrix}$$

$$+ -0.01926068 \cdot \text{Temperature}$$

$$+ \text{Match}(\text{WgtCat}) \begin{pmatrix} \text{"L"} \Rightarrow (\text{Temperature} - 24.418) \cdot -0.094787863 \\ \text{"M"} \Rightarrow (\text{Temperature} - 24.418) \cdot 0.0531640776 \\ \text{"S"} \Rightarrow (\text{Temperature} - 24.418) \cdot 0.041623785 \\ \text{else} \Rightarrow . \end{pmatrix}$$

$$+ (\text{Temperature} - 24.418) \cdot ((\text{Temperature} - 24.418) \cdot 0.0015778529)$$

$$(\text{Temperature} - 24.418)$$

$$+ \left( (\text{Temperature} - 24.418) \cdot \text{Match}(\text{WgtCat}) \begin{pmatrix} \text{"L"} \Rightarrow -0.001333101 \\ \text{"M"} \Rightarrow -0.001395455 \\ \text{"S"} \Rightarrow 0.0027285555 \\ \text{else} \Rightarrow . \end{pmatrix} \right)$$

$$(\text{Temperature} - 24.418)$$

$$+ \left( (\text{Temperature} - 24.418) \cdot ((\text{Temperature} - 24.418) \cdot 0.0003378197) \right)$$

$$(\text{Temperature} - 24.418)$$

$$+ \left( (\text{Temperature} - 24.418) \cdot \left( (\text{Temperature} - 24.418) \cdot \text{Match}(\text{WgtCat}) \begin{pmatrix} \text{"L"} \Rightarrow 0.0016461048 \\ \text{"M"} \Rightarrow -0.001075324 \\ \text{"S"} \Rightarrow -0.000570781 \\ \text{else} \Rightarrow . \end{pmatrix} \right) \right)$$

-0.427164753

S 3C)

$$+ \text{Match}(WgtCat) \begin{pmatrix} "L" \Rightarrow 0.1986244941 \\ "M" \Rightarrow -0.041064739 \\ "S" \Rightarrow -0.157559755 \\ \text{else} \Rightarrow . \end{pmatrix}$$

$$+ \text{Match}(Posture) \begin{pmatrix} "Lateral" \Rightarrow -0.211602121 \\ "Sternal" \Rightarrow -0.131305575 \\ "Upright" \Rightarrow 0.342907696 \\ \text{else} \Rightarrow . \end{pmatrix}$$

+ -0.06192594 • Temperature

$$+ \text{Match}(WgtCat) \begin{pmatrix} "L" \Rightarrow \text{Match}(Posture) \begin{pmatrix} "Lateral" \Rightarrow 0.0929767437 \\ "Sternal" \Rightarrow 0.0113496361 \\ "Upright" \Rightarrow -0.10432638 \\ \text{else} \Rightarrow . \end{pmatrix} \\ "M" \Rightarrow \text{Match}(Posture) \begin{pmatrix} "Lateral" \Rightarrow -0.030328559 \\ "Sternal" \Rightarrow -0.009381833 \\ "Upright" \Rightarrow 0.039710392 \\ \text{else} \Rightarrow . \end{pmatrix} \\ "S" \Rightarrow \text{Match}(Posture) \begin{pmatrix} "Lateral" \Rightarrow -0.062648185 \\ "Sternal" \Rightarrow -0.001967803 \\ "Upright" \Rightarrow 0.0646159878 \\ \text{else} \Rightarrow . \end{pmatrix} \\ \text{else} \Rightarrow . \end{pmatrix}$$

$$+ \text{Match}(WgtCat) \begin{pmatrix} "L" \Rightarrow (Temperature - 24.418) \cdot -0.213441529 \\ "M" \Rightarrow (Temperature - 24.418) \cdot 0.1237421692 \\ "S" \Rightarrow (Temperature - 24.418) \cdot 0.0896993599 \\ \text{else} \Rightarrow . \end{pmatrix}$$

$$+ \text{Match}(Posture) \begin{pmatrix} "Lateral" \Rightarrow (Temperature - 24.418) \cdot 0.014830533 \\ "Sternal" \Rightarrow (Temperature - 24.418) \cdot -0.00946216 \\ "Upright" \Rightarrow (Temperature - 24.418) \cdot -0.005368373 \\ \text{else} \Rightarrow . \end{pmatrix}$$

$$+ \text{Match}(WgtCat) \begin{pmatrix} "L" \Rightarrow \text{Match}(Posture) \begin{pmatrix} "Lateral" \Rightarrow (Temperature - 24.418) \cdot -0.043846298 \\ "Sternal" \Rightarrow (Temperature - 24.418) \cdot -0.034605133 \\ "Upright" \Rightarrow (Temperature - 24.418) \cdot 0.0784514315 \\ \text{else} \Rightarrow . \end{pmatrix} \\ "M" \Rightarrow \text{Match}(Posture) \begin{pmatrix} "Lateral" \Rightarrow (Temperature - 24.418) \cdot 0.034797393 \\ "Sternal" \Rightarrow (Temperature - 24.418) \cdot 0.008119947 \\ "Upright" \Rightarrow (Temperature - 24.418) \cdot -0.04291734 \\ \text{else} \Rightarrow . \end{pmatrix} \\ "S" \Rightarrow \text{Match}(Posture) \begin{pmatrix} "Lateral" \Rightarrow (Temperature - 24.418) \cdot 0.0090489052 \\ "Sternal" \Rightarrow (Temperature - 24.418) \cdot 0.0264851863 \\ "Upright" \Rightarrow (Temperature - 24.418) \cdot -0.035534092 \\ \text{else} \Rightarrow . \end{pmatrix} \\ \text{else} \Rightarrow . \end{pmatrix}$$

+ (Temperature - 24.418) • (Temperature - 24.418) • 0.0050026634

$$+ (Temperature - 24.418) \cdot (Temperature - 24.418) \cdot \text{Match}(WgtCat) \begin{pmatrix} "L" \Rightarrow -0.006037022 \\ "M" \Rightarrow 0.0001398299 \\ "S" \Rightarrow 0.0058971926 \\ \text{else} \Rightarrow . \end{pmatrix}$$

+ (Temperature - 24.418) • (Temperature - 24.418) • (Temperature - 24.418) • 0.0013242567

$$+ (Temperature - 24.418) \cdot (Temperature - 24.418) \cdot (Temperature - 24.418) \cdot \text{Match}(WgtCat) \begin{pmatrix} "L" \Rightarrow 0.0032515852 \\ "M" \Rightarrow -0.002184375 \\ "S" \Rightarrow -0.00106721 \\ \text{else} \Rightarrow . \end{pmatrix}$$

**Figure S3:** The following equations were taken from our statistical model to create the predicted curves for A) Figure 3 observations of inactive behavior per group size; B) Figure 4 observations of inactive per weight category; C) Figure 5A-5C for posture observations (lateral, sternal, and upright) per weight category.
